# Supplementary material
Source: MDPI journal article supplement (https://www.mdpi.com/2071-1050/15/16/12222)
Supplement: s1 [file s1]

# Effectiveness of Discount Incentives in Carbon Reduction: Impact of Customer-Perceived Value Sacrificed for Green Hotels

Yaqin Lin and Chun-Hung Chiu \*

School of Business, Sun Yat-sen University, No. 135, Xingang West Road, Guangzhou 510275, China; linyq73@mail2.sysu.edu.cn

\* Correspondence: chchiu2000@gmail.com or zhaojx5@mail.sysu.edu.cn

## Supplementary Materials

### Supplementary A. Derivations of the optimal decisions in Case-E.

The optimization problem of the hotel is given by

$$\text{Max } \pi_1 = \left(1 - \frac{p-d}{b}\right) (p - c - c_E) + \left(\frac{d}{1-b} - \frac{p-d}{b}\right) (v + c_E r_L - d) \quad (\text{S1})$$

$$\text{s.t.} \quad 1 - \frac{p-d}{b} \leq Q,$$

$$p(1-b) \leq d \leq 1-b,$$

$$p, d > 0.$$

By Equation (S1), we have  $\frac{\partial^2 \pi_1}{\partial p^2} = -\frac{2}{b} < 0$ ;  $\frac{\partial^2 \pi_1}{\partial d^2} = -\frac{2}{b(1-b)} < 0$ ;  $\frac{\partial^2 \pi_1}{\partial p \partial d} = \frac{\partial^2 \pi_1}{\partial d \partial p} =$

$\frac{2}{b} > 0$ . Thus, we have Hessian Matrix as follows:

$$H(\pi_1) = \begin{vmatrix} \frac{\partial^2 \pi_1}{\partial p^2} & \frac{\partial^2 \pi_1}{\partial p \partial d} \\ \frac{\partial^2 \pi_1}{\partial d \partial p} & \frac{\partial^2 \pi_1}{\partial d^2} \end{vmatrix} = \frac{4}{b(1-b)} > 0$$

As  $H(\pi_1) < 0$ , Hessian matrix is positive definite and thus the profit function of the

hotel is convex. Letting  $\mathcal{L} = \left[\frac{d-p(1-b)}{b(1-b)}\right] [p - c + v - c_E(1 - r_L) - d] + \left(1 - \frac{d}{1-b}\right) (p - c - c_E) - \lambda_1 \left(1 - \frac{p-d}{b} - Q\right) - \lambda_2 (p(1-b) - d) - \lambda_3 (d - (1-b))$ . Then,

the KKT conditions are given as below:

$$\begin{cases}
\frac{\partial \mathcal{L}}{\partial p} = \frac{-2p+2d+b+c_E(1-r_L)+c-v}{b} + \frac{\lambda_1}{b} - \lambda_2(1-b) \leq 0, \\
p \frac{\partial \mathcal{L}}{\partial p} = p \left[ \frac{-2p+2d+b+c_E(1-r_L)+c-v}{b} + \frac{\lambda_1}{b} - \lambda_2(1-b) \right] = 0, \\
\frac{\partial \mathcal{L}}{\partial d} = \frac{2(p-d-pb)-c(1-b)-c_E(1-r_L-b)+v}{b(1-b)} - \frac{\lambda_1}{b} + \lambda_2 - \lambda_3 \leq 0, \\
d \frac{\partial \mathcal{L}}{\partial d} = d \left[ \frac{2(p-d-pb)-c(1-b)-c_E(1-r_L-b)+v}{b(1-b)} - \frac{\lambda_1}{b} + \lambda_2 - \lambda_3 \right] = 0, \\
\begin{cases}
1 - \frac{p-d}{b} - Q \leq 0, \\
\lambda_1 \left( 1 - \frac{p-d}{b} - Q \right) = 0, \\
p(1-b) - d \leq 0, \\
\lambda_2(p(1-b) - d) = 0, \\
d - (1-b) \leq 0, \\
\lambda_3(d - (1-b)) = 0,
\end{cases}
\end{cases}$$

$$0 < p^*, d^* < 1,$$

$$\lambda_1^*, \lambda_2^*, \lambda_3^* \geq 0.$$

1) Case 1:  $\lambda_1 = \lambda_2 = \lambda_3 = 0$

We have  $\frac{-2p+2d+b+c_E(1-r_L)+c-v}{b} = 0$ , and  $\frac{2(p-d-pb)-c(1-b)-c_E(1-r_L-b)+v}{b(1-b)} = 0$ . Thus,

we obtain

$$\begin{aligned}
p^* &= \frac{1+c+c_E}{2}; \\
d^* &= \frac{1-b+c_E r_L+v}{2} \geq p^*(1-b) \Leftrightarrow \mathbf{b} \geq \mathbf{1} - \frac{c_E r_L+v}{c+c_E}; \\
Q &\geq 1 - \frac{p-d}{b} = \frac{b-c+v-c_E(1-r_L)}{2b}; \\
\pi_1^* &= \frac{[c+c_E(1-r_L)-v]^2 + b(c+c_E)[2(c_E r_L+v)-c-c_E] - b(1-b)[2(c+c_E)-1]}{4b(1-b)}; \\
D_{T,1} &= \frac{b-c+v-c_E(1-r_L)}{2b}; \\
D_{I,1} &= \frac{v-c(1-b)-c_E(1-b-r_L)}{2b(1-b)} > 0 \Leftrightarrow \mathbf{b} > \mathbf{1} - \frac{c_E r_L+v}{c+c_E}; \\
D_{N,1} &= \frac{1-b-v-c_E r_L}{2(1-b)} \geq 0 \Leftrightarrow \mathbf{b} \leq \mathbf{1} - \mathbf{v} - \mathbf{c}_E r_L \Leftrightarrow \mathbf{d}_1^{0*} \leq \mathbf{1} - \mathbf{b}. \\
E_{T,1} &= \frac{b(1-b-c_E r_L)-c(1-b)(1-r_L)+[v-c_E(1-r_L)](1-b-r_L)}{2b(1-b)}.
\end{aligned}$$

For Case-PE, we have  $D_{N,1} > 0$  and  $D_{I,1} > 0$ , or equivalently,  $1 - \frac{c_E r_L+v}{c+c_E} \leq b <$

$1 - v - c_E r_L$ . For Case-FE, we have  $D_{N,1} = 0$  and  $D_{I,1} > 0$ , or equivalently,  $b =$

$$1 - v - c_E r_L > 1 - \frac{c_E r_L + v}{c + c_E}.$$

**2) Case 2:  $\lambda_1 = \lambda_2 = 0$ , and  $\lambda_3 > 0$**

We have  $\mathbf{d} - (\mathbf{1} - \mathbf{b}) = \mathbf{0}$  (i.e., it is Case-FE),  $\frac{-2p+2d+b+c_E(1-r_L)+c-v}{b} = 0$ , and

$$\frac{2(p-d-pb)-c(1-b)-c_E(1-r_L-b)+v}{b(1-b)} - \frac{\lambda_1}{b} - \lambda_3 = 0. \text{ Thus, we obtain}$$

$$\lambda_3^* = \frac{v+c_E r_L-(1-b)}{1-b} > 0 \Leftrightarrow \mathbf{b} > \mathbf{1} - \mathbf{v} - \mathbf{c}_E \mathbf{r}_L;$$

$$p^* = 1 - \frac{b-c+v-c_E(1-r_L)}{2};$$

$$d^* = 1 - b;$$

$$\mathbf{Q} \geq 1 - \frac{p-d}{b} = \frac{b-c+v-c_E(1-r_L)}{2b};$$

$$\pi_1^* = \frac{(b-c+v-c_E(1-r_L))^2}{4b};$$

$$D_{T,1} = \frac{b-c+v-c_E(1-r_L)}{2b};$$

$$D_{I,1} = \frac{b-c+v-c_E(1-r_L)}{2b};$$

$$D_{N,1} = 0;$$

$$E_{T,1} = \frac{(1-r_L)(b-c+v-c_E(1-r_L))}{2b}.$$

**3) Case 3:  $\lambda_1 = \lambda_3 = 0$ , and  $\lambda_2 > 0$**

We have  $p(1-b) - d = 0$ ,  $\frac{-2p+2d+b+c_E(1-r_L)+c-v}{b} - \lambda_2(1-b) = 0$ , and

$$\frac{2(p-d-pb)-c(1-b)-c_E(1-r_L-b)+v}{b(1-b)} + \lambda_2 = 0. \text{ Thus, we obtain}$$

$$\lambda_2^* = \frac{c(1-b)-v+c_E(1-r_L-b)}{b(1-b)} > 0 \Leftrightarrow \mathbf{b} < \mathbf{1} - \frac{\mathbf{v} + \mathbf{c}_E \mathbf{r}_L}{\mathbf{c} + \mathbf{c}_E};$$

$$p^* = \frac{1+c+c_E}{2};$$

$$d^* = \frac{(1-b)(1+c+c_E)}{2};$$

$$\mathbf{Q} \geq 1 - \frac{p-d}{b} = \frac{1-c-c_E}{2};$$

$$\pi_1^* = \frac{[1-(c+c_E)]^2}{4};$$

$$D_{T,1} = \frac{1-c-c_E}{2};$$

$$D_{I,1} = 0 \text{ (Contradictory with } D_{I,1} > 0);$$

$$D_{N,1} = \frac{1-c-c_E}{2};$$

$$E_{T,1} = \frac{1-c-c_E}{2}.$$

As there is contradiction, the above solution is not optimal.

4) Case 4:  $\lambda_1 = 0$ ,  $\lambda_2 > 0$ , and  $\lambda_3 > 0$

We have  $p(1-b) - d = 0$ ,  $d - (1-b) = 0$ ,  $\frac{-2p+2d+b+c_E(1-r_L)+c-v}{b} - \lambda_2(1-b) = 0$ , and  $\frac{2(p-d-pb)-c(1-b)-c_E(1-r_L-b)+v}{b(1-b)} + \lambda_2 - \lambda_3 = 0$ . Then, we have  $\lambda_3^* = -\frac{1-c-c_E}{1-b} < 0$ , which contradicts the condition that  $\lambda_3 > 0$ . Thus, it is not optimal.

5) Case 5:  $\lambda_1 > 0$ , and  $\lambda_2 = \lambda_3 = 0$

We have  $1 - \frac{p-d}{b} - Q = 0$ ,  $\frac{-2p+2d+b+c_E(1-r_L)+c-v}{b} + \frac{\lambda_1}{b} = 0$ , and  $\frac{2(p-d-pb)-c(1-b)-c_E(1-r_L-b)+v}{b(1-b)} - \frac{\lambda_1}{b} = 0$ . Thus, we obtain

$$\lambda_1^* = b - c + v - c_E(1 - r_L) - 2bQ > 0 \Leftrightarrow Q < \frac{b-c+v-c_E(1-r_L)}{2b};$$

$$p^* = \frac{[1+b(1-2Q)+c_E r_L+v]}{2};$$

$$d^* = \frac{1-b+c_E r_L+v}{2} \geq p_1^{O*}(1-b) \Leftrightarrow b \geq 1 - \frac{c_E r_L+v}{c+c_E};$$

$$\pi_1^* = \frac{1-b(1-2Q)^2-4Q(c+c_E)-2(1-2Q)(c_E r_L+v)}{4} + \frac{(c_E r_L+v)^2}{4[1-b]};$$

$$D_{T,1} = Q;$$

$$D_{I,1} = \frac{c_E r_L+v-(1-2Q)(1-b)}{2(1-b)} > 0 \Leftrightarrow Q > \frac{1-b-c_E r_L-v}{2(1-b)};$$

$$D_{N,1} = \frac{1-b-v-c_E r_L}{2(1-b)} \geq 0 \Leftrightarrow b \leq 1 - v - c_E r_L \Leftrightarrow d_1^{O*} \leq 1 - b.$$

$$E_{T,1} = Q(1 - r_L) + \frac{r_L[1-b-c_E r_L-v]}{2[1-b]}.$$

For Case-PE, we have  $D_{N,1} > 0$  and  $D_{I,1} > 0$ , or equivalently,  $1 - \frac{c_E r_L+v}{c+c_E} \leq b <$

$1 - v - c_E r_L$ . For Case-FE, we have  $D_{N,1} = 0$  and  $D_{I,1} > 0$ , or equivalently,  $b =$

$$1 - v - c_E r_L > 1 - \frac{c_E r_L + v}{c + c_E}.$$

6) Case 6:  $\lambda_1 > 0$ ,  $\lambda_2 = 0$ , and  $\lambda_3 > 0$

We have  $1 - \frac{p-d}{b} - Q = 0$ ,  $d - (1 - b) = 0$  (i.e., it is Case-FE),

$$\frac{-2p+2d+b+c_E(1-r_L)+c-v}{b} + \frac{\lambda_1}{b} = 0, \text{ and } \frac{2(p-d-pb)-c(1-b)-c_E(1-r_L-b)+v}{b(1-b)} - \frac{\lambda_1}{b} - \lambda_3 = 0.$$

Consequently, we have

$$\lambda_1^* = b - c + v - c_E(1 - r_L) - 2bQ > 0 \Leftrightarrow Q < \frac{b-c+v-c_E(1-r_L)}{2b};$$

$$\lambda_3^* = \frac{v+c_E r_L-(1-b)}{1-b} > 0 \Leftrightarrow b > 1 - v - c_E r_L;$$

$$p^* = 1 - bQ;$$

$$d^* = 1 - b;$$

$$\pi_1^* = Q((1 - Q)b - c + v - c_E(1 - r_L));$$

$$D_{T,1} = Q;$$

$$D_{I,1} = Q;$$

$$D_{N,1} = 0;$$

$$E_{T,1} = (1 - r_L)Q.$$

7) Case 7:  $\lambda_1 > 0$ ,  $\lambda_2 > 0$ , and  $\lambda_3 = 0$

We have  $1 - \frac{p-d}{b} - Q = 0$ ,  $p(1 - b) - d = 0$ ,  $\frac{2(p-d-pb)-c(1-b)-c_E(1-r_L-b)+v}{b(1-b)} -$

$\frac{\lambda_1}{b} + \lambda_2 = 0$ , and  $\frac{-2p+2d+b+c_E(1-r_L)+c-v}{b} + \frac{\lambda_1}{b} - \lambda_2(1 - b) = 0$ . Then, we obtain

$$\lambda_1^* = 1 - c - c_E - 2Q > 0 \Leftrightarrow Q < \frac{1-c-c_E}{2};$$

$$\lambda_2^* = \frac{(1-2Q)(1-b)-c_E r_L-v}{b(1-b)} > 0 \Leftrightarrow Q < \frac{1-b-c_E r_L-v}{2(1-b)};$$

$$p^* = 1 - Q;$$

$$d^* = (1 - b)(1 - Q);$$

$$\pi_1^* = Q(1 - c - c_E - Q);$$

$$D_{T,1} = Q;$$

$$D_{I,1} = 0 \text{ (contradictory with } D_{I,1} > 0);$$

$$D_{N,1} = Q;$$

$$E_{T,1} = Q.$$

As there is contradiction, the above solution is not optimal.

**8) Case 8:  $\lambda_1 > 0$ ,  $\lambda_2 > 0$ , and  $\lambda_3 > 0$**

We have  $1 - \frac{p-d}{b} - Q = 0$ ,  $p(1-b) - d = 0$ , and  $d - (1-b) = 0$ . Then, by  $p(1-b) - d = 0$ , we obtain  $p = 1$ . Finally, we have  $1 - \frac{p-d}{b} - Q = -Q < 0$ , which contradicts the condition that  $Q > 0$ .

(Q.E.D.)

## Supplementary B. Derivations of the optimal decisions in Case-I

The optimization problem of the hotel is given by

$$\text{Max } \pi_2 = (1 - p)(p - c - c_E) \quad (\text{S2})$$

$$\text{s.t.} \quad 1 - p \leq Q,$$

$$d < p(1 - b),$$

$$p, d > 0.$$

As  $\frac{\partial^2 \pi_2}{\partial p^2} = -2 < 0$ , the profit function of the hotel is a convex function. Letting  $\mathcal{L} =$

$(1 - p)(p - c - c_E) - \lambda_1(1 - p - Q)$ , we have the KKT conditions as follows:

$$\frac{\partial \mathcal{L}}{\partial p} = -2p + 1 + c + c_E + \lambda_1 \leq 0,$$

$$p \frac{\partial \mathcal{L}}{\partial p} = p(-2p + 1 + c + c_E + \lambda_1) = 0,$$

$$1 - p - Q \leq 0,$$

$$\lambda_1(1 - p - Q) = 0,$$

$$0 < p^* < 1,$$

$$\lambda_1^* \geq 0.$$

1) Case 1:  $\lambda_1 = 0$

We have  $-2p + 1 + c + c_E = 0$  as  $p > 0$ . Then, we obtain

$$p^* = \frac{1+c+c_E}{2},$$

$$Q \geq 1 - p^* \Leftrightarrow Q \geq \frac{1-(c+c_E)}{2},$$

$$\pi_2^* = \frac{[1-(c+c_E)]^2}{4};$$

$$D_{T,2} = \frac{1-(c+c_E)}{2};$$

$$E_{T,2} = \frac{1-(c+c_E)}{2};$$

$$d^* \leq \frac{(1-b)(1+c+c_E)}{2}.$$

2) Case 2:  $\lambda_1 > 0$

We have  $1 - p - Q = 0$ . Then, we obtain

$$p^* = 1 - Q;$$

$$\lambda_1 = 2(1 - Q) - 1 - c - c_E > 0 \Leftrightarrow \mathbf{Q} < \frac{1-(c+c_E)}{2};$$

$$\pi_2^* = Q[1 - Q - (c + c_E)];$$

$$D_{T,2} = Q;$$

$$E_{T,2} = Q;$$

$$d^* \leq (1 - b)(1 - Q).$$

(Q.E.D.)



**Supplementary C. Derivations of the optimal decision results for  $d > 1 - b > p(1 - b)$**

As mentioned, only I-type customers exist for  $\frac{d}{1-b} > 1$ . Thus, by  $\theta_i \sim \text{Uniform}(0,1)$ , market demands of I-type customers, and total demand in this subcase are both given by Equation (S3).

$$D_T = D_{T,3} = D_I = D_{I,3} = \int_{\frac{p-d}{b}}^1 \theta_i d\theta_i = 1 - \frac{p-d}{b}. \quad (\text{S3})$$

As  $p \in (0,1)$ ,  $1 - b > p(1 - b)$  always holds. Then, by Equations (3) and (A3), the optimization problem of the hotel is given by

$$\text{Max } \pi_3 = \left(1 - \frac{p-d}{b}\right) (p - c - c_E + v + c_E r_L - d) \quad (\text{S4})$$

$$\text{s.t.} \quad 1 - \frac{p-d}{b} \leq Q,$$

$$d > 1 - b,$$

$$p, d > 0.$$

By Equation (S4), we have  $\frac{\partial^2 \pi_3}{\partial p^2} = -\frac{2}{b} < 0$ ;  $\frac{\partial^2 \pi_3}{\partial d^2} = -\frac{2}{b} < 0$ ;  $\frac{\partial^2 \pi_1}{\partial p \partial d} = \frac{\partial^2 \pi_1}{\partial d \partial p} = \frac{2}{b} > 0$ .

Thus, we have Hessian Matrix  $H(\pi_1) = \begin{vmatrix} \frac{\partial^2 \pi_1}{\partial p^2} & \frac{\partial^2 \pi_1}{\partial p \partial d} \\ \frac{\partial^2 \pi_1}{\partial d \partial p} & \frac{\partial^2 \pi_1}{\partial d^2} \end{vmatrix} = 0$ . This means that there is no

optimal solutions for this subcase.

(Q.E.D.)

## Supplementary D. Proofs of the propositions

### D1. Proof of Proposition 1

By Equations (1) and (2) in the main text, we have  $\theta_i > p$  as  $U_N > 0$ ; and  $\theta_i > \frac{p-d}{b}$  as  $U_I > 0$ . In addition, by comparing  $U_N$  and  $U_I$ , we have  $U_N \gtrless U_I$  if and only if  $\theta_i \gtrless \frac{d}{1-b}$ . Then, by comparing the above thresholds of  $\theta_i$ , we obtain that  $\frac{d}{1-b} \geq p \geq \frac{p-d}{b}$  if  $d \geq p(1-b)$ ; and  $\frac{p-d}{b} > p > \frac{d}{1-b}$  if  $d < p(1-b)$ . Consequently, we obtain Proposition 1. That is, **a)** if  $d \geq p(1-b)$ , customers with  $\theta_i \in (\frac{p-d}{b}, \frac{d}{1-b}]$  will participate in hotel carbon reduction while those with  $\theta_i > \frac{d}{1-b}$  will not; **b)** if  $d < p(1-b)$ , there is no customer participating in hotel carbon reduction, but those with  $\theta_i \in (p, 1]$  will check in the hotel.

(Q.E.D.)

### D2. Proof of Proposition 2(b)

$$\frac{\partial d_{PE}^{A*}}{\partial b} = \frac{\partial d_{PE}^{O*}}{\partial b} = -\frac{1}{2} < 0, \text{ and } \frac{\partial d_{FE}^{A*}}{\partial b} = \frac{\partial d_{FE}^{O*}}{\partial b} = -1 < 0.$$

(Q.E.D.)

### D3. Proof of Proposition 3

**Proof of Proposition 3(a).** We have  $\frac{\partial p_{PE}^{P*}}{\partial b} = \frac{1}{2} - Q$ , where  $Q < \bar{Q}_1$ .  $\bar{Q}_1 =$

$$\frac{b-c+v-c_E(1-r_L)}{2b} = \frac{1}{2} - \frac{c-v+c_E(1-r_L)}{2b} < \frac{1}{2}, \text{ as } c-v > 0 \text{ and } 0 < r_L < 1. \text{ Thus, we have}$$

$$Q < \bar{Q}_1 < \frac{1}{2}. \text{ Consequently, we obtain } \frac{\partial p_{PE}^{P*}}{\partial b} = \frac{1}{2} - Q > 0.$$

**Proof of Proposition 3(b).** We have  $\frac{\partial p_{FE}^{O*}}{\partial b} = -\frac{1}{2} < 0$ , and  $\frac{\partial p_{FE}^{P*}}{\partial b} = -Q < 0$ .

(Q.E.D.)

## Supplementary E. Derivations of comparison results between Case-E and Case-I

### E1. Profit comparison (Table 4)

**Case-PE:**  $v + c_E r_L \leq 1 - b < \frac{c_E r_L + v}{c + c_E}$

$$\text{a) } \Delta\pi_{BS}^{PE} = \frac{[c + c_E(1 - r_L) - v]^2 + b(c + c_E)[2(c_E r_L + v) - c - c_E] - b(1 - b)[2(c + c_E) - 1]}{4b(1 - b)} - \frac{[1 - (c + c_E)]^2}{4} =$$

$$\frac{[v - c(1 - b) - c_E(1 - b - r_L)]^2}{4b(1 - b)} > 0, \text{ as } b > 1 - \frac{c_E r_L + v}{c + c_E} \text{ (see Appendix A for details).}$$

$$\text{b) } \Delta\pi_{GS}^{PE} = \frac{1 - b(1 - 2Q)^2 - 4Q(c + c_E) - 2(1 - 2Q)(c_E r_L + v)}{4} + \frac{(c_E r_L + v)^2}{4(1 - b)} - \frac{[1 - (c + c_E)]^2}{4} = 0 \quad \Leftrightarrow$$

$$Q = \bar{Q}_1 - \frac{\sqrt{\frac{[v - c(1 - b) - c_E(1 - b - r_L)]^2}{1 - b}}}{2b}, \text{ as } Q \leq \bar{Q}_1 \text{ in Situation 3. Thus, we have } \Delta\pi_{GS}^{PE} \geq$$

$$0 \text{ if and only } Q \geq \bar{Q}_1 - \frac{\sqrt{\frac{[v - c(1 - b) - c_E(1 - b - r_L)]^2}{1 - b}}}{2b} \text{ in this situation. Notably, we have}$$

$$\bar{Q}_1 - \frac{\sqrt{\frac{[v - c(1 - b) - c_E(1 - b - r_L)]^2}{1 - b}}}{2b} < \bar{Q}_2 \text{ as } b > 1 - \frac{c_E r_L + v}{c + c_E}. \text{ As } Q > \bar{Q}_2 \text{ in Situation 3,}$$

$$\text{we have } Q > \bar{Q}_1 - \frac{\sqrt{\frac{[v - c(1 - b) - c_E(1 - b - r_L)]^2}{1 - b}}}{2b} \text{ always holds. Hence, we have } \Delta\pi_{GS}^{PE} > 0.$$

$$\text{c) } \Delta\pi_{MS}^{PE} = \frac{1 - b(1 - 2Q)^2 - 4Q(c + c_E) - 2(1 - 2Q)(c_E r_L + v)}{4} + \frac{(c_E r_L + v)^2}{4(1 - b)} - Q[1 - Q - (c +$$

$$c_E)] = \frac{[v + c_E r_L - (1 - b)(1 - 2Q)]^2}{4(1 - b)} > 0 \text{ as } Q > \frac{1 - b - c_E r_L - v}{2(1 - b)} \text{ (see Case 5 in Appendix A}$$

for details).

**Case-FE:**  $1 - b \leq v + c_E r_L$

$$\text{a) } \Delta\pi_{BS}^{FE} = \frac{[b - c + v - c_E(1 - r_L)]^2}{4b} - \frac{[1 - (c + c_E)]^2}{4} = \frac{1}{4} \left[ \left( \frac{b - c + v - c_E(1 - r_L)}{\sqrt{b}} + (1 - c - c_E) \right) \left( \frac{b - c + v - c_E(1 - r_L)}{\sqrt{b}} - (1 - c - c_E) \right) \right].$$

As  $b \geq 1 - v - c_E r_L$  for  $d = 1 - b$ , we have  $b - c + v - c_E(1 - r_L) \geq 1 - c - c_E > 0$ . Thus, we have  $\frac{b - c + v - c_E(1 - r_L)}{\sqrt{b}} > (1 - c - c_E)$ . Therefore,  $\Delta\pi_{BS}^{FE} > 0$ .

$$\text{b) } \Delta\pi_{MS}^{FE} = Q[(1 - Q)b - c + v - c_E(1 - r_L)] - \frac{[1 - (c + c_E)]^2}{4} = 0 \quad \Leftrightarrow \quad Q = \bar{Q}_1 -$$

$$\frac{\sqrt{[b - c + v - c_E(1 - r_L)]^2 - b[1 - (c + c_E)]^2}}{2b} \text{ as } Q \leq \bar{Q}_1 \text{ in MS, where } \bar{Q}_2 < Q \leq \bar{Q}_1. \text{ Thus, we}$$

have  $\Delta\pi_{MS}^{FE} \geq 0$  if and only  $Q \geq \bar{Q}_1 - \frac{\sqrt{[b-c+v-c_E(1-r_L)]^2 - b[1-(c+c_E)]^2}}{2b}$  in this

situation.  $\bar{Q}_1 - \frac{\sqrt{[b-c+v-c_E(1-r_L)]^2 - b[1-(c+c_E)]^2}}{2b} - \bar{Q}_2 =$

$$\frac{v-c(1-b)-c_E(1-b-r_L)-\sqrt{[b-c+v-c_E(1-r_L)]^2 - b[1-(c+c_E)]^2}}{2b} \geq 0 \Leftrightarrow b \leq \frac{1+c-2v+c_E(1-2r_L)}{1+c+c_E}.$$

Then, we have  $b > 1 - v - c_E r_L > \frac{1+c-2v+c_E(1-2r_L)}{1+c+c_E}$ , as  $1 - v - c_E r_L -$

$$\frac{1+c-2v+c_E(1-2r_L)}{1+c+c_E} = -\frac{(1-c-c_E)(v+c_E r_L)}{1+c+c_E} < 0. \quad \text{Thus, we have } \bar{Q}_1 -$$

$$\frac{\sqrt{[b-c+v-c_E(1-r_L)]^2 - b[1-(c+c_E)]^2}}{2b} < \bar{Q}_2. \quad \text{This means that } Q > \bar{Q}_1 -$$

$$\frac{\sqrt{[b-c+v-c_E(1-r_L)]^2 - b[1-(c+c_E)]^2}}{2b} \text{ in MS. Consequently, we have } \Delta\pi_{MS}^{FE} > 0.$$

c)  $\Delta\pi_{GS}^{FE} = Q[(1-Q)b - c + v - c_E(1-r_L)] - Q[1-Q-(c+c_E)] = Q[v +$   
 $c_E r_L - (1-b)(1-Q)] \geq 0 \Leftrightarrow Q \geq \frac{1-b-v-c_E r_L}{1-b}. \text{ As } b \geq 1 - v - c_E r_L,$   
 $\frac{1-b-v-c_E r_L}{1-b} \leq 0. \text{ Thus, } Q > \frac{1-b-v-c_E r_L}{1-b} \text{ always holds in GS, as } Q > 0.$

Consequently,  $\Delta\pi_{GS}^{FE} > 0$ .

(Q.E.D.)

## E2. Occupancy comparison (Table 5)

a)  $\Delta D_{BS}^{PE} = \Delta D_{BS}^{FE} = \frac{b-c+v-c_E(1-r_L)}{2b} - \frac{1-(c+c_E)}{2} = \frac{v-c(1-b)-c_E(1-b-r_L)}{2b} > 0$ , as  $b >$   
 $1 - \frac{c_E r_L + v}{c+c_E}$  (see Appendix A for details).

b)  $\Delta D_{MS}^{PE} = \Delta D_{MS}^{FE} = Q - \frac{1-(c+c_E)}{2} > 0$ , as  $Q > \frac{1-(c+c_E)}{2} = \bar{Q}_2$  in MS.

c)  $\Delta D_{GS}^{PE} = \Delta D_{GS}^{FE} = Q - Q = 0$ .

(Q.E.D.)

## E3. Price comparison (Table 6)

**Case-PE:**  $v + c_E r_L < 1 - b \leq \frac{c_E r_L + v}{c+c_E}$

a)  $\Delta p_{BS}^{PE} = \frac{1+c+c_E}{2} - \frac{1+c+c_E}{2} = 0$ .

b)  $\Delta p_{MS}^{PE} = \frac{[1+b(1-2Q)+c_E r_L+v]}{2} - \frac{1+c+c_E}{2} = \frac{[b(1-2Q)-c+v-c_E(1-r_L)]}{2} \geq 0 \Leftrightarrow Q \leq$

$$\frac{b-c+v-c_E(1-r_L)}{2b} = \bar{Q}_1. \text{ As } Q \leq \bar{Q}_1 \text{ in MS, we have } \Delta p_{MS}^{PE} \geq 0.$$

$$\text{c) } \Delta p_{GS}^{PE} = \frac{[1+b(1-2Q)+c_E r_L+v]}{2} - (1-Q) > 0 \Leftrightarrow Q > \frac{1-b-c_E r_L-v}{2(1-b)} > 0 \text{ (see Case 5}$$

in Appendix A for details).

**Case-FE:  $1-b \leq v+c_E r_L$**

$$\text{a) } \Delta p_{BS}^{FE} = 1 - \frac{b-c+v-c_E(1-r_L)}{2} - \frac{1+c+c_E}{2} = \frac{1-b-v-c_E r_L}{2} \leq 0, \text{ as } b \geq 1-v-c_E r_L \text{ for}$$

$d = 1-b$  (see Appendix A for details).

$$\text{b) } \Delta p_{MS}^{FE} = 1 - bQ - \frac{1+c+c_E}{2} = \frac{1-c-c_E}{2} - bQ = 0 \Leftrightarrow Q = \frac{1-c-c_E}{2b}. \text{ As } b \geq 1-v-$$

$$c_E r_L \text{ for } d = 1-b, \text{ we have } \frac{1-c-c_E}{2b} - \frac{b-c+v-c_E(1-r_L)}{2b} = \frac{1-b-v-c_E r_L}{2b} \leq 0.$$

Furthermore,  $\frac{1-c-c_E}{2b} - \frac{1-c-c_E}{2} > 0$  always holds as  $0 < b < 1$ . Therefore, we

have  $\frac{1-c-c_E}{2} < \frac{1-c-c_E}{2b} \leq \frac{b-c+v-c_E(1-r_L)}{2b}$ , i.e.,  $\bar{Q}_2 < \frac{1-c-c_E}{2b} \leq \bar{Q}_1$ . Consequently,

we obtain that  $\Delta p_{MS}^{FE} = \frac{1-c-c_E}{2} - bQ \geq 0 \Leftrightarrow Q \leq \frac{1-c-c_E}{2b}$  ( $b \leq \frac{1-c-c_E}{2Q}$ ).

$$\text{c) } \Delta p_{GS}^{FE} = 1 - bQ - (1-Q) = Q(1-b) > 0 \text{ as } 0 < b < 1.$$

(Q.E.D.)

**E4. Emission comparison results (Table 7)**

**Case-PE:  $v+c_E r_L < 1-b \leq \frac{c_E r_L+v}{c+c_E}$**

$$\text{a) } \Delta E_{BS}^{PE} = \frac{b(1-b-c_E r_L)-c(1-b)(1-r_L)+[v-c_E(1-r_L)](1-b-r_L)}{2b(1-b)} - \frac{1-(c+c_E)}{2} =$$

$$\frac{(1-b-r_L)[v-c(1-b)-c_E(1-b-r_L)]}{2b(1-b)}. \text{ As } b > 1 - \frac{c_E r_L+v}{c+c_E} \text{ (see Case 1 in Appendix A for}$$

details), we have  $v-c(1-b)-c_E(1-b-r_L) > 0$ . Thus, we have  $\Delta E_{BS}^{PE} =$

$$\frac{(1-b-r_L)[v-c(1-b)-c_E(1-b-r_L)]}{2b(1-b)} \geq 0 \text{ if and only if } b \leq 1-r_L.$$

$$\text{b) } \Delta E_{MS}^{PE} = Q(1-r_L) + \frac{r_L(1-b-c_E r_L-v)}{2(1-b)} - \frac{1-(c+c_E)}{2} \geq 0 \Leftrightarrow Q \geq$$

$$\frac{(1-b)(1-c-c_E)-r_L(1-b-c_E r_L-v)}{2(1-b)(1-r_L)}. \text{ Let } \bar{Q}_3 = \frac{(1-b)(1-c-c_E)-r_L(1-b-c_E r_L-v)}{2(1-b)(1-r_L)}, \text{ and then, we}$$

have  $\bar{Q}_3 - \bar{Q}_2 = \frac{r_L[v-c(1-b)-c_E(1-b-r_L)]}{2(1-b)(1-r_L)} > 0$ , as  $b > 1 - \frac{c_E r_L+v}{c+c_E}$ . Thus, we have

$\bar{Q}_3 > \bar{Q}_2$ . In addition, we have  $\bar{Q}_3 - \bar{Q}_1 = \frac{[b-(1-r_L)][v-c(1-b)-c_E(1-b-r_L)]}{2b(1-b)(1-r_L)} \gtrless 0$  if

and only if  $b \gtrless 1 - r_L$ . Therefore, if  $b \geq 1 - r_L$ , we have  $\bar{Q}_3 \geq \bar{Q}_1$  always holds

in Situation 3. Thus, we have  $\Delta E_{MS}^{PE} \leq 0$ , as  $Q \leq \bar{Q}_1 \leq \bar{Q}_3$  in this situation.

Otherwise, if  $b < 1 - r_L$ , we have  $\bar{Q}_2 < \bar{Q}_3 < \bar{Q}_1$ . Thus, we have  $\Delta E_{MS}^{PE} \gtrless 0$  if

and only if  $Q \gtrless \bar{Q}_3$  in Situation 3.

$$\text{c) } \Delta E_{GS}^{PE} = Q(1 - r_L) + \frac{r_L(1-b-c_E r_L-v)}{2(1-b)} - Q = \frac{r_L[v+c_E r_L-(1-b)(1-2Q)]}{2(1-b)} \gtrless 0 \Leftrightarrow Q \gtrless \frac{1-b-c_E r_L-v}{2(1-b)}.$$

As  $Q > \frac{1-b-c_E r_L-v}{2(1-b)}$  (see Case 5 in Appendix A for details), we have

$\Delta E_{GS}^{PE} < 0$  always holds.

**Case-FE:  $1 - b \leq v + c_E r_L$**

$$\text{a) } \Delta E_{BS}^{FE} = (1 - r_L)\bar{Q}_1 - \frac{1-(c+c_E)}{2} = 0 \Leftrightarrow b = \frac{(1-r_L)[c-v+c_E(1-r_L)]}{c+c_E-r_L}.$$

Then,

if  $r_L > c + c_E$ ,

we have  $\Delta E_{BS}^{FE} \gtrless 0$  if and only if  $b \gtrless \frac{(1-r_L)[c-v+c_E(1-r_L)]}{c+c_E-r_L}$ ; and have

$$\frac{(1-r_L)[c-v+c_E(1-r_L)]}{c+c_E-r_L} < 0 \text{ as } c > v \text{ and } 0 < r_L < 1. \text{ Thus, } b > \frac{(1-r_L)[c-v+c_E(1-r_L)]}{c+c_E-r_L}$$

always holds because  $b > 0$ . Consequently, we have  $\Delta E_{BS}^{FE} < 0$ .

If  $r_L = c + c_E$ ,

$$\text{we have } (1 - r_L)\bar{Q}_1 - \frac{1-(c+c_E)}{2} = -\frac{[1-(c+c_E)][c-v+c_E(1-(c+c_E))]}{2b} < 0 \text{ as } c + c_E < 1$$

and  $c > v$ . Thus, we have  $\Delta E_{BS}^{FE} < 0$  if  $r_L = c + c_E$ .

If  $r_L < c + c_E$ ,

$$\text{we have } \Delta E_{BS}^{FE} \gtrless 0 \text{ if and only if } b \gtrless \frac{(1-r_L)[c-v+c_E(1-r_L)]}{c+c_E-r_L}.$$

Therefore, we have  $\Delta E_{BS}^{FE} < 0$  if  $r_L \geq c + c_E$ ; and  $\Delta E_{BS}^{FE} \gtrless 0$  if and only if  $b \gtrless$

$$\frac{(1-r_L)[c-v+c_E(1-r_L)]}{c+c_E-r_L}, \text{ for } r_L < c + c_E.$$

$$\text{b) } \Delta E_{GS}^{FE} = (1 - r_L)Q - Q = -r_L Q < 0, \text{ as } r_L > 0 \text{ and } Q > 0.$$

c)  $\Delta E_{MS}^{FE} = (1 - r_L)Q - \frac{1-(c+c_E)}{2} \geq 0 \Leftrightarrow Q \geq \bar{Q}_4$ , where  $\bar{Q}_4 = \frac{1-(c+c_E)}{2(1-r_L)}$ . As  $0 <$

$1 - r_L < 1$ , we have  $\bar{Q}_4 > \bar{Q}_2$ . By comparing  $\bar{Q}_4$  and  $\bar{Q}_1$ , we have  $\bar{Q}_4 - \bar{Q}_1 = 0$

$$\Leftrightarrow b = \frac{(1-r_L)[c-v+c_E(1-r_L)]}{c+c_E-r_L}. \text{ Then,}$$

if  $r_L > c + c_E$ ,

we have  $\bar{Q}_4 \geq \bar{Q}_1$  if and only if  $b \leq \frac{(1-r_L)[c-v+c_E(1-r_L)]}{c+c_E-r_L}$ , where

$$\frac{(1-r_L)[c-v+c_E(1-r_L)]}{c+c_E-r_L} < 0. \text{ As } b > 0, b > \frac{(1-r_L)[c-v+c_E(1-r_L)]}{c+c_E-r_L} \text{ always holds, meaning}$$

that  $\bar{Q}_4 < \bar{Q}_1$  is always true. Then, we have  $\bar{Q}_2 < \bar{Q}_4 < \bar{Q}_1$ . Thus, we have  $\Delta E_{MS}^{FE} \geq$

0 if and only if  $Q \geq \bar{Q}_4$ .

If  $r_L = c + c_E$ ,

We have  $\bar{Q}_4 - \bar{Q}_1 = \frac{c-v+c_E(1-r_L)}{2b} > 0$  as  $c > v$  and  $0 < r_L < 1$ . Thus, we have

$\bar{Q}_4 > \bar{Q}_1$ . As  $\bar{Q}_2 < Q \leq \bar{Q}_1$ ,  $Q < \bar{Q}_4$  always holds in Situation 3, meaning that

$\Delta E_{MS}^{FE} < 0$  always holds.

If  $r_L < c + c_E$ ,

We have  $\bar{Q}_4 \geq \bar{Q}_1$  if and only if  $b \geq \frac{(1-r_L)[c-v+c_E(1-r_L)]}{c+c_E-r_L}$ . Thus, if  $b \geq$

$\frac{(1-r_L)[c-v+c_E(1-r_L)]}{c+c_E-r_L}$ , we have  $\bar{Q}_4 \geq \bar{Q}_1$ . Hence,  $Q < \bar{Q}_4$  always holds as  $\bar{Q}_2 < Q \leq$

$\bar{Q}_1$  in Situation 3, thereby having that  $\Delta E_{MS}^{FE} < 0$ . Otherwise, if  $b <$

$\frac{(1-r_L)[c-v+c_E(1-r_L)]}{c+c_E-r_L}$ , we have  $\bar{Q}_2 < \bar{Q}_4 < \bar{Q}_1$ , and thus  $\Delta E_{MS}^{FE} \geq 0$  if and only if  $Q \geq$

$\bar{Q}_4$ .

(Q.E.D.)
